# Supplementary material for: Assessing the next generation of Global Flood Models in the Central Highlands of Vietnam
Source: Copernicus journal article supplement (doi:10.5194/nhess-2023-93), 2023-06-12
Supplement: Supplementary file [file nhess-2023-93-RC1-supplement.pdf]

Review of the manuscript '*Assessing the next generation of Global Flood Models in the Central Highlands of Vietnam*' by *Hawker et al.* submitted to *NHESS*.

Recommendation: **ACCEPT**

The focus of the paper is on flooding which is a global challenge with impressive damages. The flood impact modelling was introduced and evaluated for several Vietnamese cities / locations through GIS (DEM modelling) and data analysis approaches with aim to determine the risk and expose to flooding in local population divided by peri-urban, urban and rural categories of land use.

Relevance: The presented study is the original primary research within scope of the journal. The manuscript meets general criteria of the significance in hydrological modelling using geoinformation, spatial data (DEM) and GIS tools. The study has been conducted in accordance to the technical standards in mapping and geospatial data analysis and hydrological risk assessment. It is relevant to the journal topic as corresponding to the major domain and research disciplines: Hydrology, nature hazards, *GIS, applied cartography, statistical analysis of spatial data*.

Abstract is well written and clearly describes the undertaken study.

Structure: The article is well organized with structured sections. The structure of the manuscript conforms to the journal standards and discipline norm. It has the following standard sections: 1 Introduction; 2 Hydrodynamic Modelling Materials and methods (subdivided into subsections); 3 Model Evaluation Materials and Methods (ditto); 4 GFM Evaluation (ditto); 5. Flood Exposure for the Central Highlands of Vietnam (ditto); 6 Conclusions. Sections 2, 3 and 4 are divided into the minor subsections and paragraphs for a better structure and presentation of Methodology. The numeration of the sections is correct and consecutive.

Logic: The clarity of the text logic and organization of the paper is sufficient. It demonstrates the consistent interpretation of the results with detailed explanations of flood modelling approaches and provided comments. A comparison of the results with those in previous studies is presented.

Introduction presents a background regarding the problem of flooding in general and in low and middle-income countries with rapid demographic change in particular. The Introduction defines research goals and provides a clear statement of research problem – to evaluate the impacts of flooding and compare the exposure of local areas using advanced tools of spatial data analysis and modelling. The Introduction well describes the research. Introduction and background show context of the article. Literature is well referenced and relevant.

Study area: is described with sufficient details.

Research questions and goal are identified. Objectives are relevant to the study aim.

Literature regarding the relevant topics is reviewed, formatted according to the journal rules and appropriately referenced. Major sources include published papers on *river flood risk assessment, economic response to floods, evaluation of the disaster risks, general hydrology topics and land cover data management, flood inundation modeling, water resources management*, etc. The referenced literature is within the scope of the study and well cited in the text of the manuscript.

Research gaps and weakness in former works are described – lack of high precision hazard mapping data with which to better understand or manage risk; the existing gaps are identified. The contribution of this work filling this gap is explained.

Motivation is explained: this study contributes to fill in the gaps in the existing similar research through presenting a new approach to the Global Flood Models through developed DEM-based simulation of flood modelling in Vietnam.

English language: fine. The manuscript is written by the UK citizens using professional English language throughout.

Data used in this study are clearly described: The authors used Sentinel 1 synthetic aperture radar imagery which was processed with Google Earth Engine using a change detection. Hydrological data include daily discharge data for Giang Son gauge. The household survey was performed to collect extensive

survey on health, education, occupation, income, consumption, transfers, credit, assets, risk/shocks (947 households and 4,000 individuals). For population grids, they used WorldPop distributes census information from administrative units. For land use type, they used GHS-SMOD data. Everything is well explained with data sources mentioned.

Methods: Methods described with sufficient detail and information. The workflow is well structured and clearly described with sufficient information to reproduce the approach. Yes, mentioned and explained: flood frequency analysis with three model selection criteria: Akaike Information Criterion (AIC), Bayesian Information Criterion (BIC) and the Anderson-Darling goodness-of-fit test (ADC). technically, they used nsRFA package in R. They applied the algorithms of Markov Chain Monte Carlo Simulations (MCMC) using the Bayesian MCMC interface. They evaluated the MERIT and FABDEM based GFM fluvial hazard outputs against remotely sensed flood extents and village level flood data. Then they compared the remote sensing and household survey data and assessed flooded land parcels by target districts. The authors simulated GFM fluvial hazards using data on extreme discharge return periods. The modelling is explained in details. The GFM pluvial hazard simulations was based on FABDEM DEM with provided illustrations comparing observed vs RS-based wet and dry land parcels in the household. Fluvial vs pluvial flood maps are compared for three villages. A series of flood maps is presented in Figs. 7, 8 and 9 with enlarged map fragments.

Results are reported: The authors assessed the Global Flood Model is the Digital Elevation Model (DEM), which represent the terrain without surface objects. They developed and evaluated a next generation of global hydrodynamic flood model based on the recently released FABDEM DEM. They evaluated the model and compared to a previous version using the MERIT DEM at three study sites in the central highlands of Vietnam using two independent validation data sets based on a household survey and remotely sensed observations of recent flooding. The Results are presented with clarity and include description, graphical illustrations, maps and tables with detailed comments.

Discussion interpreted the major outcomes of this study. The discussion is relevant to the initial research goals and well comments the objectives and achieved results. The authors highlighted major achievements of this study and discussed the results of flood modelling. The advantages of the obtained results are described and compared with other existing studies on flood modelling. The Discussion described the issues of methodology and results.

Conclusion Conclusions are well stated, linked to original research question, limited to supporting results and summarized the study with interpretation of facts. The importance of this paper is well summarized as follows: the authors used global flood model based on FABDEM and found that it outperformed a model based on MERIT, and the agreement between the model and remote sensing was greater than the agreement between the two validation data sets. This is useful for similar studies in flood modelling. The conclusions are appropriately stated and connected to the original questions.

Actuality, novelty and importance of the research is clear. It consists in technical approach of flood risk assessment and evaluating the over the region of Vietnam using DEM data, social questionnaire and GIS methods.

Academic contribution: Rigorous investigation performed to a high technical and professional standard in flood modelling and hydrological risk assessment. The paper increases the knowledge in flood risk hazards in Vietnam and in particular, evaluates social expose. The paper combines technical (data modelling), hydrological and GIS approaches which presents a multi-disciplinary study well deserved to be published in *NHESS*.

Figures The authors presented 20 figures (both maps and graphical plots) which are of acceptable quality, easy to read, relevant and suitable. Figures are labelled and appropriately described. They clearly illustrate the results of the undertaken study and the results of flood modelling and ranked areas at risks.

Recommendation: This manuscript can be **ACCEPTED** based on the detailed report above.

With kind regards,

- Anonymous Reviewer.

19.06.2023.
